# Supplementary material
Source: ML conference proceedings conference paper supplement (https://openaccess.thecvf.com/content/ACCV2024/html/Lau_FedRepOpt_Gradient_Re-parametrized_ACCV_2024_paper.html)
Supplement: Supplementary file 1 [file Lau_FedRepOpt_Gradient_Re-parametrized_ACCV_2024_supplemental.pdf]

# Supplementary Material for FedRepOpt: Gradient Re-parametrized Optimizers in Federated Learning

Kin Wai Lau<sup>1,2</sup>, Yasar Abbas Ur Rehman<sup>1</sup>, Pedro Porto Buarque de  
Gusmão<sup>3</sup>, Lai-Man Po<sup>2</sup>, Lan Ma<sup>1</sup>, and Yuyang Xie<sup>1</sup>

<sup>1</sup> TCL AI LAB, Hong Kong, China

<sup>2</sup> Department of Electrical Engineering, City University of Hong Kong, Hong Kong,  
China {kinwailau6-c}@my.cityu.edu.hk

<sup>3</sup> University of Surrey, United Kingdom

## 1 Network architecture used in FedRepOpt

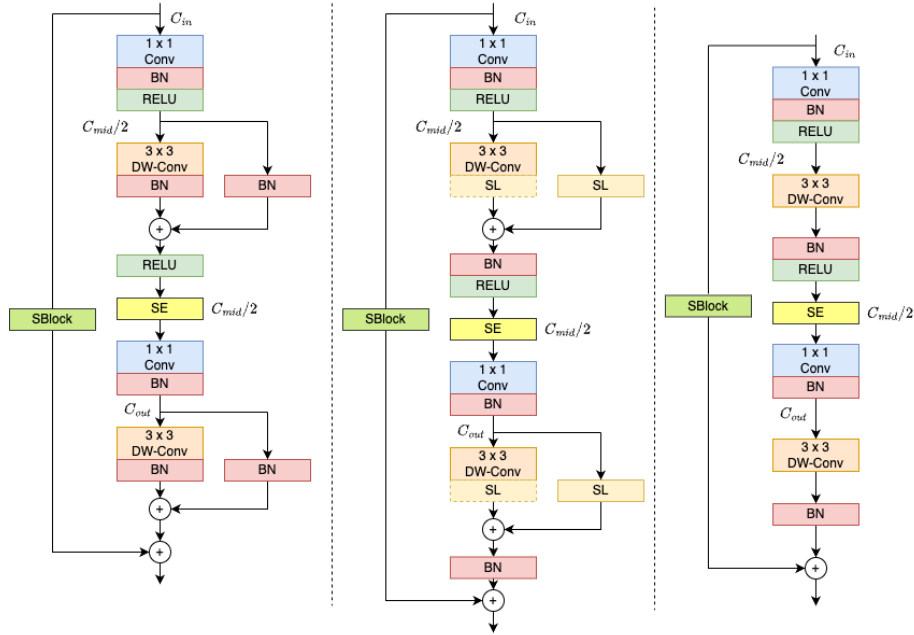

**Fig. 1:** Network architecture of the Fed-RepGhost-Tr (Left), Fed-CSLA-Ghost (Middle) and Fed-RepGhost-Inf / FedRepOpt-Ghost (Right) [1]. **SE:** Squeeze-and-excitation networks [3]. **SBlock:** Shortcut block [1]. **SL with dotted line:** Constant scaling layer [2]. **SL:** Trainable scaling layer [2]. **DW-Conv:** Depth-wise convolution.

In our proposed FedRepOpt FL framework, we consider two architectures (i.e., RepGhostNet and VGG-style) proposed in the original work on RepOpt [2]. Figure 1 demonstrates the block design of the Fed-RepGhost-Tr, Fed-CSLA-Ghost, and Fed-RepGhost-Inf/FedRepOpt-Ghost in our experiments. More precisely, Fed-RepGhost-Tr contains a parallel fusion layer (i.e., batch normalization (BN) layer), while the Fed-CSLA-Ghost replaces the BN layer with a trainable linear scaling layer. To follow the assumption in [2], where each branch only contains a linear trainable operator, the BN layer followed by the  $3 \times 3$  depth-wise convolution is replaced by a constant scaling layer. Fed-RepGhost-Inf and FedRepOpt-Ghost follow the same structure mentioned in [2] that removes the parallel fusion BN layer in Fed-RepGhost-Tr. The other architecture used in our experiment is VGG-style, as shown in Figure 2. Similar to Fed-RepGhost-Tr, Fed-RepVGG-Tr contains a  $1 \times 1$  and a BN branch in parallel. Fed-CSLA-VGG replaces the batch normalization layer with trainable/constant linear scaling layers. Fed-RepVGG-Inf and FedRepOpt-VGG are simplified versions of Fed-RepGhost-Tr without any multi-branch.

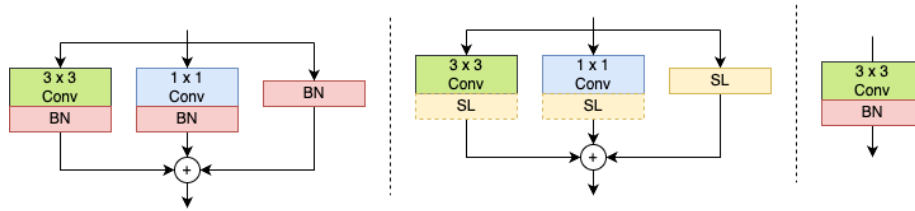

**Fig. 2:** Network architecture of the Fed-RepVGG-Tr (Left), Fed-CSLA-VGG (Middle) and Fed-RepVGG-Inf / FedRepOpt-VGG (Right) [2]. **SL with dotted line:** Constant scaling layer. **SL:** Trainable scaling layer.

## References

1. Chen, C., Guo, Z., Zeng, H., Xiong, P., Dong, J.: Repghost: A hardware-efficient ghost module via re-parameterization. arXiv e-prints pp. arXiv-2211 (2022)
2. Ding, X., Chen, H., Zhang, X., Huang, K., Han, J., Ding, G.: Re-parameterizing your optimizers rather than architectures. In: The Eleventh International Conference on Learning Representations (2023), [https://openreview.net/forum?id=B92TMCG\\_7rp](https://openreview.net/forum?id=B92TMCG_7rp)
3. Hu, J., Shen, L., Sun, G.: Squeeze-and-excitation networks. In: Proceedings of the IEEE conference on computer vision and pattern recognition. pp. 7132–7141 (2018)
